# Supplementary material for: Neuroinflammation in the paraventricular nucleus of the hypothalamus precipitates visceral pain induced by pancreatic cancer in mice
Source: PubMed Central journal article supplement — J Gastrointest Oncol. 2024 Feb 20;15(1):468–77. doi: 10.21037/jgo-24-42 (PMC10932673; doi:10.21037/jgo-24-42), 2024-02-20
Supplement: jgo-15-01-468-dss.pdf [file jgo-15-01-468-dss.pdf]

## Data Sharing Statement

|                     |                                                                                                                                                     |                                                                                                                                    |
|---------------------|-----------------------------------------------------------------------------------------------------------------------------------------------------|------------------------------------------------------------------------------------------------------------------------------------|
| <b>Article Info</b> | <a href="https://dx.doi.org/10.21037/jgo-24-42">https://dx.doi.org/10.21037/jgo-24-42</a>                                                           |                                                                                                                                    |
| <b>Item</b>         | <b>Question</b>                                                                                                                                     | <b>Authors' Response<br/>(place "-" if not applicable)</b>                                                                         |
| 1                   | Would you like to share data collected for your study to others?                                                                                    | Yes                                                                                                                                |
| 2                   | If not, would you like to share the reason for your decision?                                                                                       | -                                                                                                                                  |
| 3                   | What data in particular will be shared?                                                                                                             | Targeting glia neurons within the paraventricular nucleus of the hypothalamus alleviates pain induced by pancreatic cancer in mice |
| 4                   | Any other documents will be shared? Such as study protocol, statistical analysis plan, informed consent form, clinical study report, analytic code. | Study protocol, statistical analysis plan will be shared.                                                                          |
| 5                   | When will data availability begin?                                                                                                                  | From the publication date.                                                                                                         |
| 6                   | When will data availability end?                                                                                                                    | Two years within the publication date, since the Technique may be updated over time.                                               |
| 7                   | To whom will you share the data?                                                                                                                    | Researchers interested in pain research.                                                                                           |
| 8                   | For what type of analysis or purpose?                                                                                                               | In order to identify new targets for alleviating visceral pain in pancreatic cancer.                                               |
| 9                   | How or where can the data/documents be obtained?                                                                                                    | Emails could be sent to the address below to obtain the shared data: shxiaming1980@163.com                                         |
| 10                  | Any other restrictions?                                                                                                                             | We may balance the potential benefits and risks for each request and then provide the data that could be shared.                   |
